# Supplementary material
Source: MDPI journal article supplement (https://www.mdpi.com/2227-7390/12/5/777)
Supplement: s1 [file s1]

## Supplementary Materials

**Table S1.** The list of Investigators (LITMUS Consortium).

| The LITMUS Investigators/Group Authors                 |                                                                                                                                                                                                                                                                              |
|--------------------------------------------------------|------------------------------------------------------------------------------------------------------------------------------------------------------------------------------------------------------------------------------------------------------------------------------|
| Newcastle University                                   | Quentin M. Anstee<br>Ann K. Daly<br>Simon Cockell<br>Dina Tiniakos †<br>Pierre Bedossa †<br>Alastair Burt †<br>Fiona Oakley<br>Heather J. Cordell<br>Christopher P. Day<br>Kristy Wonders<br>Paolo Missier<br>Matthew McTeer<br>Luke Vale<br>Yemi Oluboyede<br>Matt Breckons |
| AMC Amsterdam                                          | Patrick M. Bossuyt<br>Hadi Zafarmand<br>Yasaman Vali<br>Jenny Lee<br>Max Nieuwdorp<br>Adriaan G. Holleboom<br>Athanasios Angelakis<br>Joanne Verheij †                                                                                                                       |
| Institute of Cardiometabolism And Nutrition            | Vlad Ratziu<br>Karine Clément<br>Rafael Patino-Navarrete<br>Raluca Pais                                                                                                                                                                                                      |
| Hôpital Beaujon, Assistance Publique Hopitaux de Paris | Valerie Paradis †                                                                                                                                                                                                                                                            |
| University Medical Center Mainz                        | Detlef Schuppan<br>Jörn M. Schattenberg<br>Rambabu Surabattula<br>Sudha Myneni<br>Yong Ook Kim<br>Beate K. Straub †                                                                                                                                                          |
| University of Cambridge                                | Toni Vidal-Puig<br>Michele Vacca<br>Sergio Rodrigues-Cuenca<br>Mike Allison<br>Ioannis Kamzolas<br>Evangelia Petsalaki<br>Mark Campbell<br>Chris J. Lelliott<br>Susan Davies †                                                                                               |
| Örebro University                                      | Matej Orešič<br>Tuulia Hyötyläinen<br>Aidan McGlinchey                                                                                                                                                                                                                       |

|                                                |                                                                                                                                                                |
|------------------------------------------------|----------------------------------------------------------------------------------------------------------------------------------------------------------------|
| Center for Cooperative Research in Biosciences | Jose M. Mato<br>Óscar Millet                                                                                                                                   |
| University of Bern                             | Jean-François Dufour<br>Annalisa Berzigotti<br>Mojgan Masoodi<br>Naomi F. Lange                                                                                |
| University of Oxford                           | Michael Pavlides<br>Stephen Harrison<br>Stefan Neubauer<br>Jeremy Cobbold<br>Ferenc Mozes<br>Salma Akhtar<br>Seliat Olodo-Atitebi                              |
| Perspectum                                     | Rajarshi Banerjee<br>Elizabeth Shumbayawonda<br>Andrea Dennis<br>Anneli Andersson<br>Ioan Wigley                                                               |
| Servicio Andaluz de Salud, Seville             | Manuel Romero-Gómez<br>Emilio Gómez-González<br>Javier Ampuero<br>Javier Castell<br>Rocío Gallego-Durán<br>Isabel Fernández-Lizaranzu<br>Rocío Montero-Vallejo |
| Nordic Bioscience                              | Morten Karsdal<br>Daniel Guldager Kring Rasmussen<br>Diana Julie Leeming<br>Antonia Sinisi<br>Kishwar Musa                                                     |
| Integrated Biobank of Luxembourg               | Estelle Sandt<br>Manuela Tonini                                                                                                                                |
| University of Torino                           | Elisabetta Bugianesi<br>Chiara Rosso<br>Angelo Armandi                                                                                                         |
| Università degli Studi di Firenze              | Fabio Marra                                                                                                                                                    |
| Consiglio Nazionale delle Ricerche             | Amalia Gastaldelli                                                                                                                                             |
| Università Politecnica delle Marche            | Gianluca Svegliati                                                                                                                                             |
| University Hospital of Angers                  | Jérôme Boursier                                                                                                                                                |
| Antwerp University Hospital                    | Sven Francque<br>Luisa Vonghia<br>An Verrijken<br>Eveline Dirinck<br>Ann Driessen †                                                                            |
| Linköping University                           | Mattias Ekstedt<br>Stergios Kechagias                                                                                                                          |
| University of Helsinki                         | Hannele Yki-Järvinen<br>Kimmo Porthan<br>Johanna Arola †                                                                                                       |
| UMC Utrecht                                    | Saskia van Mil                                                                                                                                                 |

|                                                                                                                                                             |                                                                                                                                                      |
|-------------------------------------------------------------------------------------------------------------------------------------------------------------|------------------------------------------------------------------------------------------------------------------------------------------------------|
| Medical School of National & Kapodistrian University of Athens                                                                                              | George Papatheodoridis                                                                                                                               |
| Faculdade de Medicina, Universidade de Lisboa                                                                                                               | Helena Cortez-Pinto                                                                                                                                  |
| Faculty of Pharmacy, Universidade de Lisboa                                                                                                                 | Cecilia M. P. Rodrigues                                                                                                                              |
| Università degli Studi di Milano                                                                                                                            | Luca Valenti<br>Serena Pelusi                                                                                                                        |
| Università degli Studi di Palermo                                                                                                                           | Salvatore Petta<br>Grazia Pennisi                                                                                                                    |
| Università Cattolica del Sacro Cuore                                                                                                                        | Luca Miele<br>Antonio Liguori                                                                                                                        |
| University Hospital Würzburg                                                                                                                                | Andreas Geier<br>Monika Rau                                                                                                                          |
| RWTH Aachen University Hospital                                                                                                                             | Christian Trautwein<br>Johanna Reißing                                                                                                               |
| University of Nottingham                                                                                                                                    | Guruprasad P. Aithal<br>Susan Francis<br>Naaventhan Palaniyappan<br>Christopher Bradley                                                              |
| Antaros Medical                                                                                                                                             | Paul Hockings<br>Moritz Schneider                                                                                                                    |
| National Institute for Health Research, Biomedical Research Centre at University Hospitals Birmingham NHS Foundation Trust and the University of Birmingham | Philip N. Newsome<br>Stefan Hübscher †                                                                                                               |
| iXscient                                                                                                                                                    | David Wenn                                                                                                                                           |
| Genfit                                                                                                                                                      | Jeremy Magnanensi                                                                                                                                    |
| Intercept Pharma                                                                                                                                            | Aldo Trylesinski                                                                                                                                     |
| OWL                                                                                                                                                         | Rebeca Mayo<br>Cristina Alonso                                                                                                                       |
| Eli Lilly and Company                                                                                                                                       | Kevin Duffin<br>James W. Perfield<br>Yu Chen<br>Mark L. Hartman                                                                                      |
| Pfizer                                                                                                                                                      | Carla Yunis<br>Theresa Tuthill<br>Magdalena Alicia Harrington<br>Melissa Miller<br>Yan Chen<br>Euan James McLeod<br>Trenton Ross<br>Barbara Bernardo |
| Boehringer-Ingelheim                                                                                                                                        | Corinna Schölch<br>Judith Ertle<br>Ramy Younes<br>Harvey Coxson<br>Eric Simon                                                                        |
| Somalogic                                                                                                                                                   | Joseph Gogain<br>Rachel Ostroff ‡<br>Leigh Alexander<br>Hannah Biegel                                                                                |

|                                      |                                                                                                        |
|--------------------------------------|--------------------------------------------------------------------------------------------------------|
| Novo Nordisk                         | Mette Skalsløvi Kjær<br>Lea Mørch Harder<br>Naba Al-Sari<br>Sanne Skovgård Veidal<br>Anouk Oldenburger |
| Ellegaard Göttingen Minipigs         | Jens Ellegaard                                                                                         |
| Novartis Pharma AG                   | Maria-Magdalena Balp<br>Lori Jennings<br>Miljen Martić<br>Jürgen Löffler<br>Douglas Applegate          |
| AstraZeneca                          | Richard Torstenson<br>Daniel Lindén                                                                    |
| Echosens                             | Céline Fournier-Poizat<br>Anne Llorca                                                                  |
| Resoundant                           | Michael Kalutkiewicz<br>Kay Pepin<br>Richard Ehman                                                     |
| Bristol-Myers Squibb                 | Gerald Horan                                                                                           |
| HistoIndex                           | Gideon Ho<br>Dean Tai<br>Elaine Chng<br>Teng Xiao                                                      |
| Gilead                               | Scott D. Patterson<br>Andrew Billin                                                                    |
| RTI-HS                               | Lynda Doward<br>James Twiss                                                                            |
| Takeda Pharmaceuticals Company Ltd.  | Paresh Thakker<br>Zoltan Derdak<br>Hiroaki Yashiro                                                     |
| AbbVie                               | Henrik Landgren                                                                                        |
| Medical University of Graz           | Carolin Lackner †                                                                                      |
| University of Groningen              | Annette Gouw †                                                                                         |
| Aristotle University of Thessaloniki | Prodromos Hytioglou †                                                                                  |
| KU Leuven                            | Olivier Govaere ‡                                                                                      |
| Resolution Therapeutics              | Clifford Brass ‡                                                                                       |

† Member of the LITMUS Histopathology Group (LHG).

‡ Refers to people who significantly contributed to the project but who have left their partner institution and now have a different affiliation.
